# Supplementary material for: Protocol for the TIDAL Melanoma Study: topical imiquimod or diphenylcyclopropenone for the management of cutaneous in-transit melanoma metastases—a phase II, single centre, randomised, pilot study
Source: PubMed Central journal article supplement — BMJ Open. 2017 Oct 6;7(10):e016816. doi: 10.1136/bmjopen-2017-016816 (PMC5640002; doi:10.1136/bmjopen-2017-016816), 2017-10-06
Supplement: bmjopen-2017-016816supp001.pdf [file bmjopen-2017-016816supp001.pdf]

**Supplementary Table 1. DPCP Study Schedule**

| Study Assessment                            | Screening and Randomisation | Treatment Period |    |    |    |    |    |    |    |    |    |     |     |     |    |    |     |     |     |     |     |             |   |
|---------------------------------------------|-----------------------------|------------------|----|----|----|----|----|----|----|----|----|-----|-----|-----|----|----|-----|-----|-----|-----|-----|-------------|---|
|                                             |                             | DOFT             | W1 | W2 | W3 | W4 | W5 | W6 | W7 | W8 | W9 | W10 | W11 | W12 | 6M | 9M | 12M | 15M | 18M | 21M | 24M | Termination |   |
| Informed Consent                            | X                           |                  |    |    |    |    |    |    |    |    |    |     |     |     |    |    |     |     |     |     |     |             |   |
| Inclusion / Exclusion                       | X                           |                  |    |    |    |    |    |    |    |    |    |     |     |     |    |    |     |     |     |     |     |             | X |
| Medical History                             | X                           |                  |    |    |    |    |    |    |    |    |    |     |     |     |    |    |     |     |     |     |     |             | X |
| FACT-M Assessment                           | X                           |                  |    |    |    | X  |    |    |    |    |    |     |     | X   | X  |    | X   |     | X   |     | X   |             | X |
| Pregnancy Test                              | X                           |                  |    |    |    |    |    |    |    |    |    |     |     |     |    |    |     |     |     |     |     |             |   |
| Routine Blood Tests                         | X                           |                  |    |    |    | X  |    |    |    | X  |    |     |     | X   | X  | X  | X   | X   | X   | X   | X   | X           | X |
| Research Blood Tests                        | X                           |                  |    |    |    | X  |    |    |    | X  |    |     |     | X   | X  | X  | X   | X   | X   | X   | X   | X           | X |
| Physical Examination                        | X                           | X                |    |    |    | X  |    |    |    | X  |    |     |     | X   | X  | X  | X   | X   | X   | X   | X   | X           | X |
| CT HNCAP or CT-PET                          | X                           |                  |    |    |    |    |    |    |    |    |    |     |     | X   |    | X  |     |     |     |     | X   |             | X |
| Measurement of lesions                      | X                           | X                |    |    |    | X  |    |    |    | X  |    |     |     | X   | X  | X  | X   | X   | X   | X   | X   | X           | X |
| Photography of lesions                      | X                           | X                |    |    |    | X  |    |    |    | X  |    |     |     | X   | X  | X  | X   | X   | X   | X   | X   | X           | X |
| RCM and Dermoscopy                          | X                           | X                |    |    |    | X  |    |    |    |    |    |     |     |     |    | X  |     |     |     |     |     |             |   |
| Biopsy of lesions                           | X                           |                  |    |    |    | X  |    |    |    |    |    |     |     |     |    | X  |     |     |     |     |     |             |   |
| Randomisation                               | X                           |                  |    |    |    |    |    |    |    |    |    |     |     |     |    |    |     |     |     |     |     |             |   |
| Application of 2% DPCP Sensitising Solution | X                           |                  |    |    |    |    |    |    |    |    |    |     |     |     |    |    |     |     |     |     |     |             |   |
| Prescription for DPCP                       |                             | X                |    |    |    | X  |    |    |    | X  |    |     |     | X   | X  | X  | X   | X   | X   | X   | X   | X           |   |
| Application of DPCP Treatment Solution      |                             | X                | X  | X  | X  | X  | X  | X  | X  | X  | X  | X   | X   | X   | X  | X  | X   | X   | X   | X   | X   | X           |   |
| Titration of DPCP                           |                             |                  |    |    |    | X  |    |    |    | X  |    |     |     | X   | X  | X  | X   | X   | X   | X   | X   | X           |   |
| Adverse Events                              |                             | X                | X  | X  | X  | X  | X  | X  | X  | X  | X  | X   | X   | X   | X  | X  | X   | X   | X   | X   | X   | X           | X |

DOFT = Day of First Treatment

**Supplementary Table 2. Imiquimod Study Schedule**

| Study Assessment              | Screening and Randomisation | Treatment Period |    |    |    |    |    |    |    |    |    |     |     |     |    |    |     |     |     |     |     |             |
|-------------------------------|-----------------------------|------------------|----|----|----|----|----|----|----|----|----|-----|-----|-----|----|----|-----|-----|-----|-----|-----|-------------|
|                               |                             | DOFT             | W1 | W2 | W3 | W4 | W5 | W6 | W7 | W8 | W9 | W10 | W11 | W12 | 6M | 9M | 12M | 15M | 18M | 21M | 24M | Termination |
| Informed Consent              | X                           |                  |    |    |    |    |    |    |    |    |    |     |     |     |    |    |     |     |     |     |     |             |
| Inclusion / Exclusion         | X                           |                  |    |    |    |    |    |    |    |    |    |     |     |     |    |    |     |     |     |     |     | X           |
| Medical History               | X                           |                  |    |    |    |    |    |    |    |    |    |     |     |     |    |    |     |     |     |     |     | X           |
| FACT-M Assessment             | X                           |                  |    |    |    | X  |    |    |    |    |    |     |     | X   | X  |    | X   |     | X   |     | X   | X           |
| Pregnancy Test                | X                           |                  |    |    |    |    |    |    |    |    |    |     |     |     |    |    |     |     |     |     |     |             |
| Routine Blood Tests           | X                           |                  |    |    |    | X  |    |    |    | X  |    |     |     | X   | X  | X  | X   | X   | X   | X   | X   | X           |
| Research Blood Tests          | X                           |                  |    |    |    | X  |    |    |    | X  |    |     |     | X   | X  | X  | X   | X   | X   | X   | X   | X           |
| Physical Examination          | X                           | X                |    |    |    | X  |    |    |    | X  |    |     |     | X   | X  | X  | X   | X   | X   | X   | X   | X           |
| CT HNCAP or CT-PET            | X                           |                  |    |    |    |    |    |    |    |    |    |     |     |     | X  |    | X   |     |     |     | X   | X           |
| Measurement of lesions        | X                           | X                |    |    |    | X  |    |    |    | X  |    |     |     | X   | X  | X  | X   | X   | X   | X   | X   | X           |
| Photography of lesions        | X                           | X                |    |    |    | X  |    |    |    | X  |    |     |     | X   | X  | X  | X   | X   | X   | X   | X   | X           |
| RCM and Dermoscopy            | X                           | X                |    |    |    | X  |    |    |    |    |    |     |     |     |    | X  |     |     |     |     |     |             |
| Biopsy of lesions             | X                           |                  |    |    |    | X  |    |    |    |    |    |     |     |     |    | X  |     |     |     |     |     |             |
| Randomisation                 | X                           |                  |    |    |    |    |    |    |    |    |    |     |     |     |    |    |     |     |     |     |     |             |
| Prescription for 5% imiquimod |                             | X                |    |    |    |    |    |    |    |    |    |     |     |     | X  |    |     |     |     |     |     |             |
| Application of 5% imiquimod   |                             | X                | X  | X  | X  | X  | X  | X  | X  | X  | X  | X   | X   | X   | X  | X  | X   | X   | X   | X   | X   | X           |
| Adverse Events                |                             | X                | X  | X  | X  | X  | X  | X  | X  | X  | X  | X   | X   | X   | X  | X  | X   | X   | X   | X   | X   | X           |

DOFT = Day of First Treatment
